# Supplementary material for: Update of students’ and lecturers’ perspectives on online learning in dental education after a five-semester experience due to the SARS-CoV-2 (COVID-19) pandemic: insights for future curriculum reform
Source: PubMed Central journal article supplement (PMC10411012; doi:10.1186/s12909-023-04544-2), 2023-08-08
Supplement: 12909_2023_4544_MOESM1_ESM.pdf [file 12909_2023_4544_MOESM1_ESM.pdf]

## Questionnaire Students

### Handling

1. How often did you participate on the synchronous digital teaching formats offered?

Please select one of the following answers:

- not at all
- in minority
- nearly half
- in majority
- completely
- no answer

2. How often did you participate on the asynchronous digital teaching formats offered (e.g. recorded lectures and seminars deposited on k-med)?

- not at all
- in minority
- nearly half
- in majority
- completely
- no answer

3. Which device did you mainly use for the participation on the online learning courses?

Please select only one of the following answers:

- Smartphone
- Tablet
- Laptop
- PC
- No answer

4. Why did you choose this device?

Please select only one of the following answers:

- It was just available.
- It was the only device with camera and microphone.
- I find it most suitable.
- I don't know.

5. Please share your perspective regarding future dental curriculum. Which digital teaching formats would be suitable for online learning in the new dental licensure act?

Please choose one of the following answers:

- Synchronous formats such as live online seminars/ lectures (e.g. Webex).
- Asynchronous formats such as recorded lectures and seminars deposited on k-med on online platforms for self-study (e.g. k-MED, Stud-IP).
- Combination of synchronous and asynchronous formats (e.g. lectures and scripts on online platforms and "consultation hours" for students' questions).
- None at all. Dentistry should only be taught as a face-to-face course.

6. To what extent do the following statements apply to online learning?

Please select the appropriate answer for each point:

|                                                                                           | strongly disagree     | disagree              | neutral               | agree                 | strongly agree        | no answer             |
|-------------------------------------------------------------------------------------------|-----------------------|-----------------------|-----------------------|-----------------------|-----------------------|-----------------------|
| I found it difficult to follow the teaching content.                                      | <input type="radio"/> | <input type="radio"/> | <input type="radio"/> | <input type="radio"/> | <input type="radio"/> | <input type="radio"/> |
| In the context of online learning, I dare to ask questions more often than face-to-face.  | <input type="radio"/> | <input type="radio"/> | <input type="radio"/> | <input type="radio"/> | <input type="radio"/> | <input type="radio"/> |
| I had the opportunity to actively contribute to the teaching (e.g. questions or similar). | <input type="radio"/> | <input type="radio"/> | <input type="radio"/> | <input type="radio"/> | <input type="radio"/> | <input type="radio"/> |
| I can follow the course content with concentration.                                       | <input type="radio"/> | <input type="radio"/> | <input type="radio"/> | <input type="radio"/> | <input type="radio"/> | <input type="radio"/> |
| I get tired of the digital teaching formats on the screen.                                | <input type="radio"/> | <input type="radio"/> | <input type="radio"/> | <input type="radio"/> | <input type="radio"/> | <input type="radio"/> |
| The digital implementation of the teaching allows me to plan my daily routine well.       | <input type="radio"/> | <input type="radio"/> | <input type="radio"/> | <input type="radio"/> | <input type="radio"/> | <input type="radio"/> |

Didactic benefit and motivation

7. To what extent do the following statements apply to the online learning?

Please select the appropriate answer for each point:

|                                                                                                                                              | strongly disagree     | disagree              | neutral               | agree                 | strongly agree        | no answer             |
|----------------------------------------------------------------------------------------------------------------------------------------------|-----------------------|-----------------------|-----------------------|-----------------------|-----------------------|-----------------------|
|                                                                                                                                              | <input type="radio"/> | <input type="radio"/> | <input type="radio"/> | <input type="radio"/> | <input type="radio"/> | <input type="radio"/> |
| The quality and quantity of knowledge has remained unchanged during the digital teaching formats (compared to solely face-to-face teaching). | <input type="radio"/> | <input type="radio"/> | <input type="radio"/> | <input type="radio"/> | <input type="radio"/> | <input type="radio"/> |
| By participating on the online learning, I feel well prepared for the practical part of education.                                           | <input type="radio"/> | <input type="radio"/> | <input type="radio"/> | <input type="radio"/> | <input type="radio"/> | <input type="radio"/> |
| The theoretical teaching content is easy to learn with online learning.                                                                      | <input type="radio"/> | <input type="radio"/> | <input type="radio"/> | <input type="radio"/> | <input type="radio"/> | <input type="radio"/> |
| I generally prefer face-to-face rather than online learning.                                                                                 | <input type="radio"/> | <input type="radio"/> | <input type="radio"/> | <input type="radio"/> | <input type="radio"/> | <input type="radio"/> |

I think online learning formats belong to modern teaching in dentistry.

The use of new digital teaching methods (e.g. online teaching) motivates me to learn.

I do not feel comfortable participating to online learning formats because I miss the communication in person with the lecturers.

In the context of the COVID-19 pandemic, online learning formats were useful, but beyond the pandemic, they should not find further application in dental curriculum.

8. How do you prefer to learn?

Please select all that apply:

- by oneself
- with other students together
- on screen (e.g. PC, laptop, tablet)
- by practicing (e.g. exercises on manikins or patients)
- by listening (e.g. in lectures in presence or digitally)
- by reading (e.g. books)
- by writing down what has previously been learned

Overall assessment

9. Please assess face-to-face learning regarding the following aspects:

Please select the appropriate answer for each point:

|                                | very low              | low                   | medium                | high                  | very high             | no answer             |
|--------------------------------|-----------------------|-----------------------|-----------------------|-----------------------|-----------------------|-----------------------|
| Follow-up effort               | <input type="radio"/> | <input type="radio"/> | <input type="radio"/> | <input type="radio"/> | <input type="radio"/> | <input type="radio"/> |
| Knowledge transfer             | <input type="radio"/> | <input type="radio"/> | <input type="radio"/> | <input type="radio"/> | <input type="radio"/> | <input type="radio"/> |
| Opportunities to ask questions | <input type="radio"/> | <input type="radio"/> | <input type="radio"/> | <input type="radio"/> | <input type="radio"/> | <input type="radio"/> |
| Number of tips from lecturers  | <input type="radio"/> | <input type="radio"/> | <input type="radio"/> | <input type="radio"/> | <input type="radio"/> | <input type="radio"/> |
| Fun factor                     | <input type="radio"/> | <input type="radio"/> | <input type="radio"/> | <input type="radio"/> | <input type="radio"/> | <input type="radio"/> |
| Stress during the course       | <input type="radio"/> | <input type="radio"/> | <input type="radio"/> | <input type="radio"/> | <input type="radio"/> | <input type="radio"/> |

|                                                                                                             | very low              | low                   | medium                | high                  | very high             | no answer             |
|-------------------------------------------------------------------------------------------------------------|-----------------------|-----------------------|-----------------------|-----------------------|-----------------------|-----------------------|
| Threshold of interaction with teachers (from "very low" = high interaction to "very high" = no interaction) | <input type="radio"/> | <input type="radio"/> | <input type="radio"/> | <input type="radio"/> | <input type="radio"/> | <input type="radio"/> |

10. Please assess online learning regarding the following aspects:

Please select the appropriate answer for each point:

|                                                                                                             | very low              | low                   | medium                | high                  | very high             | no answer             |
|-------------------------------------------------------------------------------------------------------------|-----------------------|-----------------------|-----------------------|-----------------------|-----------------------|-----------------------|
| Follow-up effort                                                                                            | <input type="radio"/> | <input type="radio"/> | <input type="radio"/> | <input type="radio"/> | <input type="radio"/> | <input type="radio"/> |
| Knowledge transfer                                                                                          | <input type="radio"/> | <input type="radio"/> | <input type="radio"/> | <input type="radio"/> | <input type="radio"/> | <input type="radio"/> |
| Opportunities to ask questions                                                                              | <input type="radio"/> | <input type="radio"/> | <input type="radio"/> | <input type="radio"/> | <input type="radio"/> | <input type="radio"/> |
| Number of tips from lecturers                                                                               | <input type="radio"/> | <input type="radio"/> | <input type="radio"/> | <input type="radio"/> | <input type="radio"/> | <input type="radio"/> |
| Fun factor                                                                                                  | <input type="radio"/> | <input type="radio"/> | <input type="radio"/> | <input type="radio"/> | <input type="radio"/> | <input type="radio"/> |
| Stress during the course                                                                                    | <input type="radio"/> | <input type="radio"/> | <input type="radio"/> | <input type="radio"/> | <input type="radio"/> | <input type="radio"/> |
| Threshold of interaction with teachers (from "very low" = high interaction to "very high" = no interaction) | <input type="radio"/> | <input type="radio"/> | <input type="radio"/> | <input type="radio"/> | <input type="radio"/> | <input type="radio"/> |

11. How large should be the amount of online learning regarding the theoretical part of education (independent of COVID-19) in the future curriculum?

Please enter your answer here:

\_\_\_\_ Percent (%)

Numbers in percent from 0 to 100

12. Please assess for which type of course you think digital teaching formats are suitable:

|               | not at all suitable   | rather not suitable   | neutral               | rather suitable       | very suitable         | no answer             |
|---------------|-----------------------|-----------------------|-----------------------|-----------------------|-----------------------|-----------------------|
| Seminar       | <input type="radio"/> | <input type="radio"/> | <input type="radio"/> | <input type="radio"/> | <input type="radio"/> | <input type="radio"/> |
| Lecture       | <input type="radio"/> | <input type="radio"/> | <input type="radio"/> | <input type="radio"/> | <input type="radio"/> | <input type="radio"/> |
| Demonstration | <input type="radio"/> | <input type="radio"/> | <input type="radio"/> | <input type="radio"/> | <input type="radio"/> | <input type="radio"/> |

|                                             | not at all suitable   | rather not suitable   | neutral               | rather suitable       | very suitable         | no answer             |
|---------------------------------------------|-----------------------|-----------------------|-----------------------|-----------------------|-----------------------|-----------------------|
| Case presentation                           | <input type="radio"/> | <input type="radio"/> | <input type="radio"/> | <input type="radio"/> | <input type="radio"/> | <input type="radio"/> |
| Education with practical parts and patients | <input type="radio"/> | <input type="radio"/> | <input type="radio"/> | <input type="radio"/> | <input type="radio"/> | <input type="radio"/> |

Final questions

13. What is your gender?

Please select only one of the following answers:

- male
- female
- inter / diverse
- no answer

14. Please state your age in years.

Please enter your answer here: \_\_\_\_ years

15. In which semester are you currently studying?

Please enter your answer here:

\_\_\_\_ semester

16. How did you predominantly participate in the online learning?

Please select only one of the following answers:

- alone
- physically together with other students
- other

17. Did you predominantly participate in the digital teaching formats with the video image switched on?

Please select only one of the following answers:

- Yes
- No

18. What type of internet connection did you use mostly?

Please select only one of the following answers:

- Mobile network
- WLAN

- LAN
- No answer

19. Do you have a workplace that allows you to participate in online learning without disruptions?

Please select only one of the following answers:

- Yes
- No

20. Do you have adequate equipment that enables you to participate in online learning without interference (camera, headset)?

Please select only one of the following answers:

- Yes
- No

21. How often did you have problems with your internet connection so that you could not follow relevant content properly?

Please select only one of the following answers:

- never
- among the minority of events
- about half of the events
- for the majority of events
- always
- no answer

22. Where did you spend most of your time during online learning?

Please select only one of the following answers:

- at home
- at the dental clinic
- at the workplace of the (part-time) job
- in public (e.g. in transport, café/restaurant etc.)
- Other

### Questionnaire Lecturers

#### Handling

1. Which online learning format(s) have you predominantly offered for your courses since the spring term 2020 (COVID-19 pandemic)?

Please select only one of the following answers:

- Synchronous formats such as live online seminars/ lectures (e.g. Webex).

- Asynchronous formats such as recorded lectures and seminars deposited on k-med on online platforms for self-study (e.g. k-MED, Stud-IP).
- Combination of synchronous and asynchronous formats (e.g. lectures and scripts on online platforms and "office hours" for questions).
- None at all, since all teaching formats are face-to-face.
- Other

2. Which device did you mainly use for the online learning courses?

Please select only one of the following answers:

- Smartphone
- Tablet
- Laptop
- PC
- No answer

3. Why did you choose this device?

Please select only one of the following answers:

- It was just available.
- It was the only device with camera and microphone.
- I find it most suitable.
- I don't know.

4. Please share your perspective regarding future dental curriculum. Which digital teaching formats would be suitable for online learning in the new dental licensure act?

Please choose one of the following answers:

- Synchronous formats such as live online seminars/ lectures (e.g. Webex).
- Asynchronous formats such as recorded lectures and seminars deposited on k-med on online platforms for self-study (e.g. k-MED, Stud-IP).
- Combination of synchronous and asynchronous formats (e.g. lectures and scripts on online platforms and "office hours" for questions).
- None at all. Dentistry should only be taught as a face-to-face course.

5. To what extent do the following statements apply to online learning?

Please select the appropriate answer for each point:

|                                                                     | strongly<br>disagree  | disagree              | neutral               | agree                 | strongly<br>agree     | no answer             |
|---------------------------------------------------------------------|-----------------------|-----------------------|-----------------------|-----------------------|-----------------------|-----------------------|
| I found it difficult to create digital teaching formats.            | <input type="radio"/> | <input type="radio"/> | <input type="radio"/> | <input type="radio"/> | <input type="radio"/> | <input type="radio"/> |
| The preparation effort is higher compared to face-to-face teaching. | <input type="radio"/> | <input type="radio"/> | <input type="radio"/> | <input type="radio"/> | <input type="radio"/> | <input type="radio"/> |

|                                                                                                                     | strongly disagree     | disagree              | neutral               | agree                 | strongly agree        | no answer             |
|---------------------------------------------------------------------------------------------------------------------|-----------------------|-----------------------|-----------------------|-----------------------|-----------------------|-----------------------|
| In the context of online learning, students are more likely to dare to ask questions than in face-to-face teaching. | <input type="radio"/> | <input type="radio"/> | <input type="radio"/> | <input type="radio"/> | <input type="radio"/> | <input type="radio"/> |
| I can concentrate better on my teaching.                                                                            | <input type="radio"/> | <input type="radio"/> | <input type="radio"/> | <input type="radio"/> | <input type="radio"/> | <input type="radio"/> |
| I get tired of the digital teaching formats on the screen.                                                          | <input type="radio"/> | <input type="radio"/> | <input type="radio"/> | <input type="radio"/> | <input type="radio"/> | <input type="radio"/> |
| The digital implementation of the teaching allows me to plan my daily routine well.                                 | <input type="radio"/> | <input type="radio"/> | <input type="radio"/> | <input type="radio"/> | <input type="radio"/> | <input type="radio"/> |

Didactic benefit and motivation

6. To what extent do the following statements apply to the online learning?

Please select the appropriate answer for each point:

|                                                                                                                                                | strongly disagree     | disagree              | neutral               | agree                 | strongly agree        | no answer             |
|------------------------------------------------------------------------------------------------------------------------------------------------|-----------------------|-----------------------|-----------------------|-----------------------|-----------------------|-----------------------|
|                                                                                                                                                | <input type="radio"/> | <input type="radio"/> | <input type="radio"/> | <input type="radio"/> | <input type="radio"/> | <input type="radio"/> |
| The quality and quantity of knowledge has remained unchanged among students during online learning (compared to solely face-to-face teaching). | <input type="radio"/> | <input type="radio"/> | <input type="radio"/> | <input type="radio"/> | <input type="radio"/> | <input type="radio"/> |
| Preparing students for the practical courses works well with online learning formats.                                                          | <input type="radio"/> | <input type="radio"/> | <input type="radio"/> | <input type="radio"/> | <input type="radio"/> | <input type="radio"/> |
| The theoretical teaching content is easy to teach with online learning.                                                                        | <input type="radio"/> | <input type="radio"/> | <input type="radio"/> | <input type="radio"/> | <input type="radio"/> | <input type="radio"/> |
| I generally prefer face-to-face teaching rather than online learning for my teaching.                                                          | <input type="radio"/> | <input type="radio"/> | <input type="radio"/> | <input type="radio"/> | <input type="radio"/> | <input type="radio"/> |
| I think online learning formats belong to modern teaching in dentistry.                                                                        | <input type="radio"/> | <input type="radio"/> | <input type="radio"/> | <input type="radio"/> | <input type="radio"/> | <input type="radio"/> |
| The use of new digital teaching methods (e.g. online teaching) motivates me to teach.                                                          | <input type="radio"/> | <input type="radio"/> | <input type="radio"/> | <input type="radio"/> | <input type="radio"/> | <input type="radio"/> |
| I do not feel comfortable teaching online learning formats because I                                                                           | <input type="radio"/> | <input type="radio"/> | <input type="radio"/> | <input type="radio"/> | <input type="radio"/> | <input type="radio"/> |



miss the communication in person with students.

In the context of the COVID-19 pandemic, online learning formats were useful, but beyond the pandemic, they should not find further application in dental curriculum.

I perceived the students to be disciplined and attentive during the digital teaching formats.

7. Would you have dealt intensively with the topic of "digital teaching formats" even without the Covid-19 pandemic?

Please select only one of the following answers:

- No, absolutely not.
- I can't judge.
- Yes, but not in intensity.
- Yes, to the same extent as necessitated by the pandemic.

Overall assessment

8. Please assess face-to-face learning regarding the following aspects:

Please select the appropriate answer for each point:

|                                                                                                             | very low              | low                   | medium                | high                  | very high             | no answer             |
|-------------------------------------------------------------------------------------------------------------|-----------------------|-----------------------|-----------------------|-----------------------|-----------------------|-----------------------|
| Preparation effort                                                                                          | <input type="radio"/> | <input type="radio"/> | <input type="radio"/> | <input type="radio"/> | <input type="radio"/> | <input type="radio"/> |
| Knowledge transfer                                                                                          | <input type="radio"/> | <input type="radio"/> | <input type="radio"/> | <input type="radio"/> | <input type="radio"/> | <input type="radio"/> |
| Possibility to ask questions                                                                                | <input type="radio"/> | <input type="radio"/> | <input type="radio"/> | <input type="radio"/> | <input type="radio"/> | <input type="radio"/> |
| Number of tips for students                                                                                 | <input type="radio"/> | <input type="radio"/> | <input type="radio"/> | <input type="radio"/> | <input type="radio"/> | <input type="radio"/> |
| Fun factor                                                                                                  | <input type="radio"/> | <input type="radio"/> | <input type="radio"/> | <input type="radio"/> | <input type="radio"/> | <input type="radio"/> |
| Stress during the course                                                                                    | <input type="radio"/> | <input type="radio"/> | <input type="radio"/> | <input type="radio"/> | <input type="radio"/> | <input type="radio"/> |
| Threshold of interaction with students (from "very low" = high interaction to "very high" = no interaction) | <input type="radio"/> | <input type="radio"/> | <input type="radio"/> | <input type="radio"/> | <input type="radio"/> | <input type="radio"/> |

9. Please assess online learning regarding the following aspects:

Please select the appropriate answer for each point:

|                                                                                                             | very low              | low                   | medium                | high                  | very high             | no answer             |
|-------------------------------------------------------------------------------------------------------------|-----------------------|-----------------------|-----------------------|-----------------------|-----------------------|-----------------------|
| Preparation effort                                                                                          | <input type="radio"/> | <input type="radio"/> | <input type="radio"/> | <input type="radio"/> | <input type="radio"/> | <input type="radio"/> |
| Knowledge transfer                                                                                          | <input type="radio"/> | <input type="radio"/> | <input type="radio"/> | <input type="radio"/> | <input type="radio"/> | <input type="radio"/> |
| Possibility to ask questions                                                                                | <input type="radio"/> | <input type="radio"/> | <input type="radio"/> | <input type="radio"/> | <input type="radio"/> | <input type="radio"/> |
| Number of tips for students                                                                                 | <input type="radio"/> | <input type="radio"/> | <input type="radio"/> | <input type="radio"/> | <input type="radio"/> | <input type="radio"/> |
| Fun factor                                                                                                  | <input type="radio"/> | <input type="radio"/> | <input type="radio"/> | <input type="radio"/> | <input type="radio"/> | <input type="radio"/> |
| Stress during the course                                                                                    | <input type="radio"/> | <input type="radio"/> | <input type="radio"/> | <input type="radio"/> | <input type="radio"/> | <input type="radio"/> |
| Threshold of interaction with students (from "very low" = high interaction to "very high" = no interaction) | <input type="radio"/> | <input type="radio"/> | <input type="radio"/> | <input type="radio"/> | <input type="radio"/> | <input type="radio"/> |

10. How large should be the amount of online learning regarding the theoretical part of education (independent of COVID-19) in the future curriculum?

Please enter your answer here:

\_\_\_\_ Percent (%)

Numbers in percent from 0 to 100

11. Please assess for which type of course you think digital teaching formats are suitable:

|                                             | not at all suitable   | rather not suitable   | neutral               | rather suitable       | very suitable         | no answer             |
|---------------------------------------------|-----------------------|-----------------------|-----------------------|-----------------------|-----------------------|-----------------------|
| Seminar                                     | <input type="radio"/> | <input type="radio"/> | <input type="radio"/> | <input type="radio"/> | <input type="radio"/> | <input type="radio"/> |
| Lecture                                     | <input type="radio"/> | <input type="radio"/> | <input type="radio"/> | <input type="radio"/> | <input type="radio"/> | <input type="radio"/> |
| Demonstration                               | <input type="radio"/> | <input type="radio"/> | <input type="radio"/> | <input type="radio"/> | <input type="radio"/> | <input type="radio"/> |
| Case presentation                           | <input type="radio"/> | <input type="radio"/> | <input type="radio"/> | <input type="radio"/> | <input type="radio"/> | <input type="radio"/> |
| Education with practical parts and patients | <input type="radio"/> | <input type="radio"/> | <input type="radio"/> | <input type="radio"/> | <input type="radio"/> | <input type="radio"/> |

Increase in expertise

12. To what extent do the following statements about digital teaching formats apply to you?

Please select the applicable answer for each item:

This is how it was BEFORE the Covid-19 pandemic (before SoSe 2020) without online learning formats ...

So it is AFTER five semesters with online learning formats ...

|                                                                            | not applicable        | rather not applicable | neutral               | rather applicable     | very applicable       | not applicable        | rather not applicable | neutral               | rather applicable     | very applicable       |
|----------------------------------------------------------------------------|-----------------------|-----------------------|-----------------------|-----------------------|-----------------------|-----------------------|-----------------------|-----------------------|-----------------------|-----------------------|
| I could/can independently conduct a synchronous online learning course.    | <input type="radio"/> | <input type="radio"/> | <input type="radio"/> | <input type="radio"/> | <input type="radio"/> | <input type="radio"/> | <input type="radio"/> | <input type="radio"/> | <input type="radio"/> | <input type="radio"/> |
| I could/can independently conduct an asynchronous online learning course.  | <input type="radio"/> | <input type="radio"/> | <input type="radio"/> | <input type="radio"/> | <input type="radio"/> | <input type="radio"/> | <input type="radio"/> | <input type="radio"/> | <input type="radio"/> | <input type="radio"/> |
| I was/am positively disposed towards the topic of online learning formats. | <input type="radio"/> | <input type="radio"/> | <input type="radio"/> | <input type="radio"/> | <input type="radio"/> | <input type="radio"/> | <input type="radio"/> | <input type="radio"/> | <input type="radio"/> | <input type="radio"/> |
| I was/am motivated to implement online learning formats.                   | <input type="radio"/> | <input type="radio"/> | <input type="radio"/> | <input type="radio"/> | <input type="radio"/> | <input type="radio"/> | <input type="radio"/> | <input type="radio"/> | <input type="radio"/> | <input type="radio"/> |

### Final questions

13. What is your gender?

Please select only one of the following answers:

- male
- female
- inter / diverse
- no answer

14. How many years of active teaching experience do you have (excluding parental leave, sabbatical, extended illness)?

Please enter your answer here: \_\_\_\_ years

15. What type of internet connection did you use mostly?

Please select only one of the following answers:

- Mobile network
- WLAN
- LAN
- No answer

16. How often did you have problems with your internet connection during online learning courses?

Please select only one of the following answers:

- never
- among the minority of events
- about half of the events
- for the majority of events
- always
- no answer

17. Where did you spend most of your time during online learning?

Please select only one of the following answers:

- at home (in home office)
- own office at dental clinic
- common room at dental clinic
- Other
